# Supplementary material for: Two Opsin 3-Related Proteins in the Chicken Retina and Brain: A TMT-Type Opsin 3 Is a Blue-Light Sensor in Retinal Horizontal Cells, Hypothalamus, and Cerebellum
Source: PubMed Central journal article supplement (PMC5115664; doi:10.1371/journal.pone.0163925), 2016-11-18
Supplement: pone.0163925.s001.pdf [file pone.0163925.s001.pdf]

**A**

|                          | TM3                                                                               | ICL2 | TM4 | ECL2     |
|--------------------------|-----------------------------------------------------------------------------------|------|-----|----------|
| Elephant Shark TMT1      | GCVWYGFVNTLFGIVSLMSLTI LSYDRYITITGT-TEADITNYNKTIVGIALSWIYSLMWTLPPLFGWSSNYGPE      |      |     | GGPTTCS  |
| Spotted Gar TMT1A        | GCVWYGFVNSLFGTVSLISLALLSYERYITMMRT-VEADATDYKKAVALGILVSWYSSLWTLPPLFGWSSYGP         |      |     | GGPTTCS  |
| Spotted Gar TMT1B        | GCVWYGFVNSCLGMVSLISLAVLSYERYSTMMGS-TEADATNYRRIKIGVIMLSWGYSLLWTLPPLFGWSSYGP        |      |     | GGPTTCS  |
| Zebrafish TMT1B          | GCVWYGFANSLFGIVSLISLAVLSYERYCTMMGS-TEADATNYKKVIGVIMLSWIYSLIWTLPPLFGWSSYGP         |      |     | GGPTTCS  |
| Zebrafish TMT1A          | GCVWYGFINSFLGVVSLISLAVLSYERYCTMMGS-TQADSTNYRKYVIGIAFSWIYSVMVWTLPLFGWSSYGP         |      |     | GGPTTCS  |
| Western Clawed Frog TMT1 | GCIWYGFVNTLFGTVSLVSLAVLSYERYCTMLRS-TEADLTNYKKAWLGILVSWIYSLVWTLPLFGWSSYGP          |      |     | GGPTTCS  |
| Green Anole TMT1         | GCVWYGFANTFVGTVSLISLAVLSYERYCTMMGT-TEADATNYKKVWVWIFLSWIYSLFWSLPLFGWSSYGP          |      |     | GGPTTCS  |
| Flycatcher TMT1          | ACAWHGFATALCGIISLISLAVLSYERYCTMTRT-AEPDITNYRKWAGIILSWYSSLWTLPPLFGWSSYGP           |      |     | GGPTTCS  |
| Elephant Shark TMT2      | GCKWYGFANSLFGIVSLLSLFCVSYDRSYMITRI-RTTHNFKRPIILAIGVSWLYSLWTVPPLFGWSAYGPE          |      |     | GQGISCS  |
| Spotted Gar TMT2         | GCMWYGFINSFCGIVSLISLAVLSYDRYSTLTV--YNKQVTDYRKPPLAVGGSWLYSLMWTVPPLLWSSYGL          |      |     | GAGTSCS  |
| Zebrafish TMT2A          | GCMWYGFVNSCFGIVSLISLAI LSYDRYSTLTV--YNKRAPDYRKPLLAVGGSWLYSLFWTVPPLLWSSYGL         |      |     | GAGTSCS  |
| Zebrafish TMT2B          | GCMWYGFINSFCGIVSLISLVLSYDRYSTLTV--YHKRAPDYRKPLLAVGGSWLYSLIWTVPPLLWSSYGL           |      |     | GAGTSCS  |
| Western Clawed Frog TMT2 | GCVWYGFVNSCFGIVSLISLA I LSYERYSTLTL--YNKGGPNFKKALLAVASSWLYSLVWTVPPLLWSSYGR        |      |     | GAGTSCS  |
| Green Anole TMT2         | GCRWYGFVNSCFGIVSLISLA I LSYERYSTLTQ--TNKRGSYQKALLGVGGSWLYSLIWTVPPLIGWSSYGL        |      |     | GAGTSCS  |
| Flycatcher TMT2          | ACSWYGFVNSCFGIVSLISLAVLSYERYSTLTL--CHKRSDDFRKALLAVAASWIYSLWTVPPLLWSSYGE           |      |     | GAGTSCS  |
| Chicken TMT-L            | GCRWYGFVNSCFGIVSLISLAVLSYERYSTLTL--CNKRSDYRKPPLLAVGGSWYSLWTVPPLLWSSYGI            |      |     | GAGTSCS  |
| Chicken TMT-S            | GCRWYGFVNSCFGIVSLISLAVLSYERYSTLTL--CNKRSDYRKPPLLAVGGSWYSLWTVPPLLWSSYGI            |      |     | GAGTSCS  |
| Opossum TMT2             | GCRWYGFANSFCGIVSLISLA I LSYERYRTLTL--CPGQGADYQKALLAVAGSWLYSLVWTVPPLIGWSSYGE       |      |     | GAGTSCS  |
| Elephant Shark TMT3      | GCKWYGFANSLFGIVSLISL SLLSYERYATV LKS-TKADSTNYKKA WVI IAFSWFYSLVWTLPLFGWSSYGP      |      |     | GYGTTCS  |
| Spotted Gar TMT3         | GCKWYGFANSLFGIVSLVSL SLLSYERYVTV LRS-TKADVRDYRKAWLCIAGSWLYSLVWTLPPFLGWSYGP        |      |     | GGPTTCS  |
| Zebrafish TMT3B          | GCKWYGFANSLFGIVSLMSLS ILSYERYAALLRA-TKADVSDFRRAWLVCAGSWLYSLWTLPPLFGWSSYGP         |      |     | GGPTTCS  |
| Zebrafish TMT3A          | GCRWYGFANALFGIVSLVSLAVLSYERYSTILCS-SKADASDYRKAWLFITGCWLYSLWTVPPLLWSSYGP           |      |     | GGPTTCS  |
| Western Clawed Frog TMT3 | GCKWYGFVNSLFGVMSI L SMLSYERYLTVLKG-TKADMTDYKKS WLCI I VSWLYSLCWTLPLIGWSSYGL       |      |     | ESSGTTCS |
| Green Anole TMT3         | GCRWYGVANVLFGLVSLVSL ILSYERYMVLRLKPKSMTSSYSRSLCIGGTWLYSLSWTLPLFIWSSFGPKP          |      |     | GESCS    |
| Elephant Shark Opn3      | ACVWDGFSHSLFGTVSIVTLTVLAYERIRV---VNAKATNFPWAWRAIYTWYSLAWSGAPLVGWNRYSLHRLGCA       |      |     |          |
| Spotted Gar Opn3         | TCVWDGFSNSLFGIVSIMTLTVLAYERIRV---VHAKVIDFTWSWKA IAYIWL YSLAWTGAPLIGWNRYTLERHRLGCS |      |     |          |
| Zebrafish Opn3           | TCVWDGFSNSLFGIVSIMTL SGLAYERIRV---VHAKVDFPWAWRAITHIWL YSLAWTGAPLLGWNRYTLEVHQLGCS  |      |     |          |
| Coelacanth Opn3          | GCIWDGFSNSLFGIVSIMTLTVLAYERIRV---VHAKVIDFSWTRAI IYIWL YSLAWTGAPLIGWNRYSLIHHLGCS   |      |     |          |
| Green Anole Opn3         | GCVWDGFSNSLFGIVSIMTLTVLAYERIRV---VHAKVIDFSWSRAI IYIWL YSLAWTGAPLLGWNHYTLEIHLGCS   |      |     |          |
| Chicken Opn3             | GCVWDGFSNSLFGIVSIMTLTVLAYERIRV---VHAKVIDFSWSRAI IYIWL YSLAWTGAPLLGWNRYTLEIHLGCS   |      |     |          |
| Flycatcher Opn3          | GCVWDGFSNSLFGIVSIMTLALAYERIRV---VHAKVIDFSWSRAI IYIWL YSLAWTGAPLLGWNRYTLEIHLGCS    |      |     |          |
| Opossum Opn3             | GCAWDGFSNTLFGIVSIMTLTVLAYERIRV---VHAKVINFSWAWRAI IYIWL YSLVWTGAPLLGWNRYTLEIHLGCS  |      |     |          |
| Mouse Opn3               | GCAWDGFSGSLFGVSIITTLTVLAYERIRV---VHARVINFSWAWRAI IYIWL YSLAWAGAPLLGWNRYILDHHLGCT  |      |     |          |
| Human Opn3               | GCVWDGFSGSLFGIVSIATLTVLAYERIRV---VHARVINFSWAWRAI IYIWL YSLAWAGAPLLGWNRYILDVHHLGCT |      |     |          |
| Bovine Rhodopsin         | GCNLEGGFATLGGELWLSVLVAIERYV VVCKP-MSNFRFGENHA I MGVAFTWVMALACAAPPLVGSRYIPEGMQCSCG |      |     |          |

E113 (D/E)R(Y/W) motif E181

**B**

|                          | TM6                                                                                                                                            | ECL3 | TM7 | C terminus                                                                        |
|--------------------------|------------------------------------------------------------------------------------------------------------------------------------------------|------|-----|-----------------------------------------------------------------------------------|
| Elephant Shark TMT1      | FLLCWLPGYIVALLATFGSPGLIPTASII P SVLAKTSTVYNP I IY I FMNKQF-SR-CFRALLSQNSPVAFSTRNSSKTLRDGH                                                      |      |     | -----NTQKTH-----KNFTCIEASV-A-QQTT-----AQQNRSSSDQEDTGLDV-S-----                    |
| Spotted Gar TMT1A        | FLLCWLPGYIVALIATFGKPGLIPTVSIIPSVLAKSSTVYNP I IY VFMNNQF-YR-CFCSFVRCQKPTINSNSRSTSKTLKACR                                                        |      |     | -----AAKMIH-----DNKFSFLVSE-G-QLST-----ANHNPNANGHNEVHGTL-SVDETKPA-SRVPHYHS-----    |
| Spotted Gar TMT1B        | FLLCWLPGYIVALLATFGKSGLVTPASI I P SLLAKSSTVFNP I IY I FLNKQF-YR-CFRAFLMCQRPAANGSSVSRSSKTKPCR                                                    |      |     | -----AARRAI-----NDNRNFVVTSA-G-RHST-----LIQNRTDSVGERGSS-----WDASKPPV-LLVAHYNG----- |
| Zebrafish TMT1B          | YLLCWLPGYIMALLATFGAPLVTAESI VPSILAKSSTVINPVIY I FMNKQF-YR-CFRALLNCDKQQRGSSKSSK-TKPF                                                            |      |     | -----PGRRTD-----NFTFMVASV-GPNQTN-----PVEDGPPSAD-----NTKPAVLSLVAHYNG-----          |
| Zebrafish TMT1A          | YLLCWLPGYIMALLATFGHPGLVTPAASI VPSLLAKSSTVINP I IY I FMNKQF-CR-CFHALIMCTTPERGSSFKNSKVKTLR                                                       |      |     | -----TVRRAN-----GQNVTFAVASA-VHRT-----PYSDRQKSSSEGEKLPATGGGTSKPVV-SLVAYYNG-----    |
| Western Clawed Frog TMT1 | FLLCWLPGYGMALVATFGKPGI I P SPSASI I P SVLAKSSTVYNP I IY I FLNKQF-YR-CFTAL IHCNKHQPQVSNKSSKTKIML                                                |      |     | -----TARKLP-----DANFTVNAASN-P-PSSS-----VVKYEADSKTHNG-----DTKPFK-TLVANYVI-----     |
| Green Anole TMT1         | FLLCWLPGYIVALIATFGKPGLIPTASII P SVLAKSSTVYNPVIY I FLNKQF-YR-CFCALLKCGKKS I ASSNKCSSRSTRVCR                                                     |      |     | -----SIRKQD-----NFTFVAASA-GPPSSEHQDA ILSIQNPPEPTDQNSP-----KAKQRV-LLVAHYSV-----    |
| Flycatcher TMT1          | FLLCWLPHYAVALIATFGQDGLIPTASII PAILAKSSTVYNP I IY VFLNKQF-YR-CFVALLRCNKSPSSLPRLKKQQ                                                             |      |     | -----QKPG-----SEELLPKPSQAQPPQNRD-----AERGAVGLQGETTCM-----                         |
| Elephant Shark TMT2      | FLLCWPMPYIGIMALLATFGSDLIPTSVIIPVVLAKTSTVYNP I IY VLMNKQF-FQ-CYKALYQM                                                                           |      |     | -----                                                                             |
| Spotted Gar TMT2         | YLLCWIPIYGVVAMLATFGRPGTVSPIASVVP S I LAKSSTVFNP I IY I LLMNKQF-YG-CFLKLFHCQKRSSANGPFSLQSRITVIQ                                                 |      |     | -----LNRRVY-----NNTIDGTQV-INTADEDREGTPPMKVSNPPEMNP-----                           |
| Zebrafish TMT2A          | YLLCWPMPYGVVAMMATFGRPGI I S P IASVVP S LAKSSTVINP I IY I LLMNKQF-YR-CFLI I LHCNKHSSLENGQSSMPSRITVIQ                                            |      |     | -----LNRRPY-----SNPVADNAP-PSIDLQ-DCSTPVSQ-----                                    |
| Zebrafish TMT2B          | YLLCWPMPYGVVAMMATFGRPGI I S P VASVVP S LAKSSTVINP I IY I LLMNKQF-YR-CFRILFCQSRLLQNGHSSMPSKTTVIQ                                                |      |     | -----LNRRVN-----SNAVACTAQ-ISTGTHNHCSTHVERTSNPPEVIP-----                           |
| Western Clawed Frog TMT2 | YLLCWLPGYVALLATFGRPGLVSPVASVP S I LAKSSTVFNP I IY I LLMNKQF-YK-CFLILFHCHPTSSADGKSI CQSNYTVIQ                                                   |      |     | -----LNQKLN-----NIVAI PGQTQIPESVDKMPCI-HRQNNESPDDQMP-----QSTTEH-LISGT-----        |
| Green Anole TMT2         | YLLCWPMPYGVIALLATFGKPGI I P SPSASI I P SVLAKSSTVFNP I IY I LLMNKQF-YK-CFLMLLHCQPSVADGETI CQSKVMA I H                                           |      |     | -----QNQKAG-----GGVILKSQV-VPQDEKAI C LLSPESSLDPVL-----ESTPQL-SKENSF-----L         |
| Flycatcher TMT2          | YLLCWIPIYGVIALLATFGKPGI I P S I LAKSSTVCPNP I IY I LLMNKQF-YK-CFRQLFHCQPPSSTNGEPTYHSKVTVIQ                                                     |      |     | -----LDQRV-----GGNMCNNEP-HPETDSKMPSSLHP-----EPIS-----KAVSPP-S-----                |
| Chicken TMT-L            | YLVCGIPIYGVIALLATFGKPGVTPVASI I P S I LAKSSTVCPNP I IY I LLMNKQF-YK-CFRQLFHCQPPSSTDGEPTCHSKVTVIQ                                               |      |     | -----LNQKTD-----GGKLCNNK-REPETDNKVTSL LHPEPGLPAA-----KTVPPM-----                  |
| Chicken TMT-S            | YLVCGIPIYGVIALLATFGKPGVTPVASI I P S I LAKSSTVCPNP I IY I LLMNKQF-RS-ATLKL Y FHQGLSGV                                                           |      |     | -----LDQCV-----                                                                   |
| Opossum TMT2             | YLLCWPMPYGMIALLATFGPPGVSPVANVVP S I LAKSSTVCPNP I IY VLMNKQF-YK-CFLI L FHCQPAQSGPDVSLCPSNVTVIQ                                                 |      |     | -----LGQRKN-----KDAP-----GSI-----                                                 |
| Elephant Shark TMT3      | YLLCWLPGYGTVALIGTFGNADLIPTCSVIP S I LAKSSTVINPVIY I FMNKQF-YR-CFVTLRLCNTAPT LHQ                                                                |      |     | -----                                                                             |
| Spotted Gar TMT3         | YLLCWPMPYIGIMIALIATFGRADLVPTASII P S I LAKSSTVFNP I IY I LLMNQRVRYRTPCPAVLALSEH                                                                |      |     | -----IERLCC-----PVF-----                                                          |
| Zebrafish TMT3B          | YLLCWPMPYGVVALLATFGRTGLIPTVSIIPSVLAKSSTVYNPVIY VLFNNQF-YR-CFVAFKQCQEPVHGNQNPQHSSKEDPH                                                          |      |     | -----VFRPCD-----GAS I HRSAE-GPQKKEQHS-----SLVVHYTP-----                           |
| Zebrafish TMT3A          | YLLCWPMPYGMALLGTF-SAGITSPASVSSLLAKSSTVINP I IY VLFNNQF-YR-CFIALVRSAGAEPPVHLT LHTEEGAAQQH                                                       |      |     | -----CIPMGLYAATS-PPESPMDT-PQMTQNSSLQRGNKTL-----VLVHCTP-----                       |
| Western Clawed Frog TMT3 | YLLCWPMPYGLVSLMTAFGKPGMIPTVSI I P S I LAKSSTFINP I IY I FMNKQF-YR-CFIALIKESGPHNENI STSRQSMR                                                    |      |     | -----LETACK-----VQSSIFYTHKA-RRTKDTTSSPEMRKL-----TLTVHYRDDR-----                   |
| Green Anole TMT3         | YFLCWPYGVIVLITVFGKPGTVPLSIVSIPS I LAKASTVNP I IY VLLNKQF-YR-CFTVLMNCDPLPKHLEMLHSHKWSRTPNAESQEGPVHLLGIQRRLGSTKVRPNPLGRNSKDLPFRTPKT-PSMSSK       |      |     | -----YERPPHDSADQIHKN-----                                                         |
| Elephant Shark Opn3      | FLICWMPYAVVVFVAVGYDTVITPAVAI I P S F I A K S S T A Y N P I I Y I F M S R K Y - R R - C L S Q L F C S H L M S L Q W S I K D P S S K A R N D M   |      |     | -----PVKPIVLSQK-G-----DRPKKRVTFSSSI-VFIITSDDTQELGSIAG-SNATQISIV-----QVQPL-----    |
| Spotted Gar Opn3         | FLICWTPYAVVSMLEAFGKKSIVTPTVAI I P S F F A K S S T A Y N P V I Y I F M S R K F - R R - C L L R L C A R L V S I R R S I K D R P I - A R V E K    |      |     | -----PIRPIVVSQKV-----ERPKKVTFNSSSI-VFIITSDNTNLDIPSK-NSLSEVNI-----KVRPL-----       |
| Zebrafish Opn3           | FLVCGWTPYAVVSMLEAFGKKSIVTPTVAI I P S L F A K S S T A Y N P I I Y I F M S R K F - R R - C M L Q M L C S R L T S L Q H T I K D R P L - S R I E H |      |     | -----PIRPIVMSQSRT-----DRPKKRVTFSSSI-VFI IASHDTHPLDITSKCNDEPDINVI-----QVRPL-----   |
| Coelacanth Opn3          | FLICWMPYVVSLLVSYGYGSSITPTVAI I L S F F A K S S T A Y N P I I Y I F M S R K F - R R - C L L K L C I R L V R F Q R S I K D R P V - A E N D R     |      |     | -----PIRPIVSHKIG-----DRPKKVTFNSSSI-VFIITSDDTQPMETMKS-NS-ARVNI-----QVRPL-----      |
| Green Anole Opn3         | FLICWMPYAVVSL IAYGYGH I TPTVAI I P S F F A K S S T A Y N P V I Y I F M S R K F - R R - C L V Q L F C V Q F L R F K R L K E Q P A - I E S N K   |      |     | -----PIRPIVMSQKV-----DRPKKVTFNSSSI-IFIITSDDEQIDVSTK-CSDTKINVI-----QVKPL-----      |
| Chicken Opn3             | FLICWMPYAVVSLLVTYGYSNLVTPVAI I P S F F A K S S T A Y N P V I Y I F M S R K F - R Q - C L L Q L L C F R L M R F Q R I M K E P S G - A G N V K   |      |     | -----PIRPIVMSQKV-----DRPKKVTFNSSSI-IFI IASDDTQIIDNSK-HNGTKVNI-----QVKPL-----      |
| Flycatcher Opn3          | FLICWMPYAVVSLI TYGYSNLVTPVAI I P S F F A K S S T A Y N P V I Y I F M S R K F - R H - C L L Q L L C F R L M R F Q R T M K E T P A - T G S D K   |      |     | -----PIRPIVMSQKAG-----DRPKKVTFNSSSI-IFIITSDDEQIIDSSK-HNETKVNVI-----QVKPLQ-----G   |
| Opossum Opn3             | FLFCWMPYAVICLLVANGYGLVTPVAI I A S L F A K S S T A Y N P I I Y I F M S R K F - R R - C L L Q L L C F R L L F Q Q P K D R P V - I R T E K        |      |     | -----QIRPIVMSQKV-----DRPKKVTFNSSSI-IFIITSDQTI DENDK-NSGTKVNVI-----QVRPL-----      |
| Mouse Opn3               | FLFCWMPYIVTRFLVNGYGH I VTPVSI V S Y L F A K S S T V Y N P V I Y I F M S R K F - R R - S L L Q L L C F R L L R C Q R P A K N L P A - A E S E M  |      |     | -----HIRPIVMSQKDG-----DRPKKVTFNSSSI-IFIITSELSVEDSDR-SSASKVDVI-----QVRPL-----      |
| Human Opn3               | FLVCGWPIVIFLVVNGHGH I VTPVSI V S Y L F A K S S T V Y N P V I Y V F M I R K F - R R - S L L Q L L C L R L L R C Q R P A K D L P A - A G S E M   |      |     | -----QIRPIVMSQKDG-----DRPKKVTFNSSSI-IFIITSELSVDDSDK-TNGSKVDVI-----QVRPL-----      |
| Bovine Rhodopsin         | FLICWLPGYAVYIFTHQGSDFGIFMTI P A F F A K T S A V Y N P V I Y I M M N K Q F - R N - C M V T T L C G G K N P L G D D E A S T T V S K T E T S      |      |     | -----QVAPA-----                                                                   |

CWxP motif K296 NPxxY motif
