# Supplementary material for: Two Opsin 3-Related Proteins in the Chicken Retina and Brain: A TMT-Type Opsin 3 Is a Blue-Light Sensor in Retinal Horizontal Cells, Hypothalamus, and Cerebellum
Source: PubMed Central journal article supplement (PMC5115664; doi:10.1371/journal.pone.0163925), 2016-11-18

**A**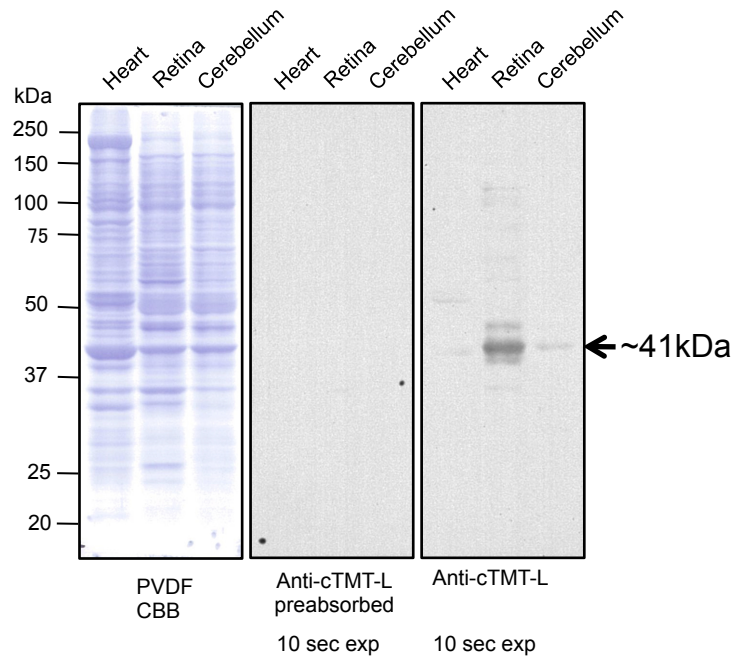**B**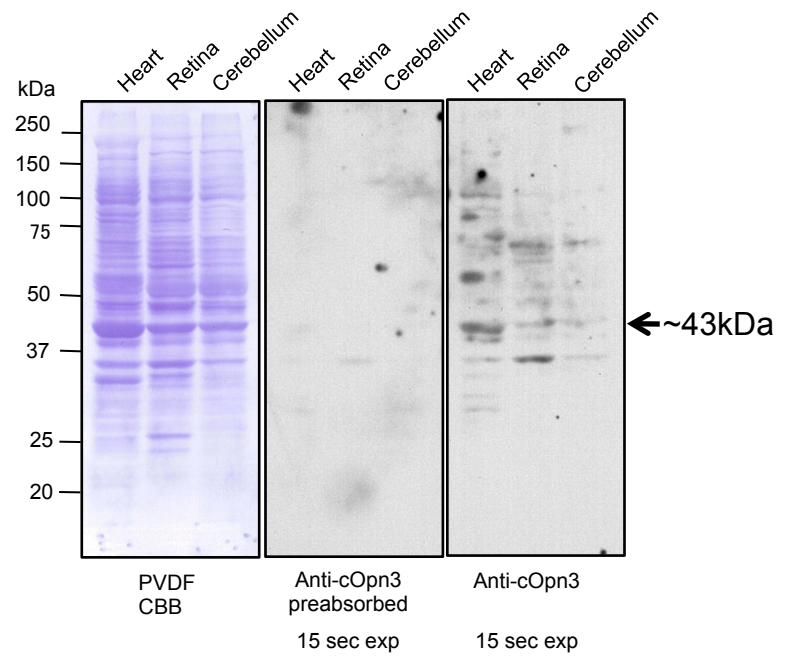**C**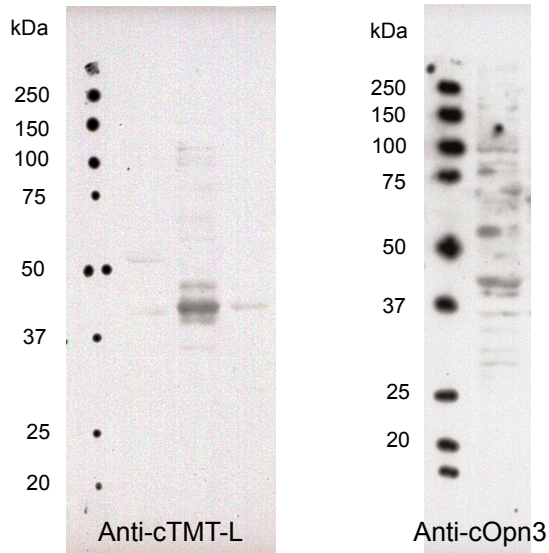

Supplement: pone.0163925.s004.pdf [file pone.0163925.s004.pdf]
